# Supplementary material for: Lower Somatic Mutation Levels in the λ Light-Chain Repertoires with Chronic HBV Infection
Source: Hindawi journal article supplement (doi:10.1155/2021/5525369), 2021-06-07
Supplement: f1 [file 5525369.f1.pdf]

**Supplementary Table 1: The usage of IGKV genes in the HH and IHB library**

| <b>HH-IgK</b> | <b>Frequency (%)</b> | <b>IHB-IgK</b> | <b>Frequency (%)</b> |
|---------------|----------------------|----------------|----------------------|
| IGKV4-1       | 12.94                | IGKV4-1        | 13.40                |
| IGKV3-20      | 11.80                | IGKV3-20       | 10.95                |
| IGKV2-30      | 10.08                | IGKV2-30       | 10.10                |
| IGKV3-11      | 8.03                 | IGKV3-11       | 8.17                 |
| IGKV1-39      | 7.10                 | IGKV1-39       | 6.87                 |
| IGKV2-28      | 6.04                 | IGKV1-5        | 6.07                 |
| IGKV1-5       | 5.85                 | IGKV2-28       | 6.02                 |
| IGKV1-33      | 4.94                 | IGKV1-33       | 5.66                 |
| IGKV3-15      | 3.61                 | IGKV3-15       | 3.23                 |
| IGKV1-12      | 3.01                 | IGKV1-9        | 3.07                 |
| IGKV1-16      | 2.90                 | IGKV1-17       | 2.96                 |
| IGKV1-9       | 2.61                 | IGKV1-16       | 2.37                 |
| IGKV2-24      | 2.46                 | IGKV1-12       | 2.36                 |
| IGKV2-29      | 2.11                 | IGKV2-29       | 2.09                 |
| IGKV1-17      | 2.09                 | IGKV1-27       | 2.00                 |
| IGKV1-27      | 1.97                 | IGKV2D-29      | 1.76                 |
| IGKV2D-29     | 1.41                 | IGKV2-24       | 1.73                 |
| IGKV1D-16     | 1.31                 | IGKV1-6        | 1.28                 |
| IGKV1-NL1     | 1.26                 | IGKV3D-15      | 1.20                 |
| IGKV1-6       | 0.95                 | IGKV1-8        | 1.14                 |
| IGKV1-8       | 0.94                 | IGKV1D-16      | 1.07                 |
| IGKV1D-12     | 0.93                 | IGKV1-NL1      | 0.95                 |
| IGKV6-21      | 0.86                 | IGKV3D-20      | 0.92                 |
| IGKV3D-15     | 0.86                 | IGKV1-13       | 0.74                 |
| IGKV3D-20     | 0.74                 | IGKV1D-12      | 0.69                 |
| IGKV2D-30     | 0.73                 | IGKV6-21       | 0.57                 |
| IGKV3D-11     | 0.51                 | IGKV2D-30      | 0.55                 |
| IGKV1-13      | 0.44                 | IGKV3D-11      | 0.53                 |
| IGKV6D-21     | 0.40                 | IGKV1D-13      | 0.33                 |
| IGKV2-40      | 0.27                 | IGKV2-40       | 0.27                 |
| IGKV1D-8      | 0.25                 | IGKV1D-8       | 0.26                 |
| IGKV1D-13     | 0.24                 | IGKV6D-21      | 0.23                 |
| IGKV3D-7      | 0.14                 | IGKV3D-7       | 0.19                 |
| IGKV1D-43     | 0.10                 | IGKV1D-43      | 0.18                 |
| IGKV5-2       | 0.07                 | IGKV5-2        | 0.05                 |
| IGKV2D-26     | 0.03                 | IGKV2D-26      | 0.04                 |
| IGKV1D-17     | 0.01                 | IGKV1D-17      | 0.00                 |

**Supplementary Table 2: The usage of IGKJ genes in the HH and IHB library**

| <b>HH-IgK</b>   | <b>Frequency (%)</b> | <b>IHB-IgK</b>  | <b>Frequency (%)</b> |
|-----------------|----------------------|-----------------|----------------------|
| <b>IGKJ4*01</b> | 26.97                | <b>IGKJ4*01</b> | 28.00                |
| <b>IGKJ5*01</b> | 22.45                | <b>IGKJ5*01</b> | 22.15                |
| <b>IGKJ1*01</b> | 21.55                | <b>IGKJ1*01</b> | 20.70                |
| <b>IGKJ2*01</b> | 14.89                | <b>IGKJ2*01</b> | 15.75                |
| <b>IGKJ3*01</b> | 9.23                 | <b>IGKJ3*01</b> | 8.74                 |
| <b>IGKJ2*02</b> | 3.07                 | <b>IGKJ2*02</b> | 3.15                 |
| <b>IGKJ4*02</b> | 1.09                 | <b>IGKJ4*02</b> | 1.08                 |
| <b>IGKJ2*03</b> | 0.57                 | <b>IGKJ2*03</b> | 0.38                 |
| <b>IGKJ2*04</b> | 0.19                 | <b>IGKJ2*04</b> | 0.05                 |

**Supplementary Table 3: The usage of IGLV genes in the HH and IHB library**

| <b>HH-IgL</b>    | <b>Frequency (%)</b> | <b>IHB-IgL</b>   | <b>Frequency (%)</b> |
|------------------|----------------------|------------------|----------------------|
| <b>IGLV3-1</b>   | 17.66                | <b>IGLV3-1</b>   | 22.66                |
| <b>IGLV3-21</b>  | 15.01                | <b>IGLV9-49</b>  | 15.70                |
| <b>IGLV10-54</b> | 11.02                | <b>IGLV3-21</b>  | 14.91                |
| <b>IGLV9-49</b>  | 9.54                 | <b>IGLV3-27</b>  | 8.08                 |
| <b>IGLV3-27</b>  | 6.46                 | <b>IGLV3-19</b>  | 5.95                 |
| <b>IGLV6-57</b>  | 5.05                 | <b>IGLV10-54</b> | 5.18                 |
| <b>IGLV3-19</b>  | 4.57                 | <b>IGLV6-57</b>  | 4.57                 |
| <b>IGLV2-8</b>   | 4.08                 | <b>IGLV2-8</b>   | 2.99                 |
| <b>IGLV5-52</b>  | 3.60                 | <b>IGLV5-37</b>  | 2.60                 |
| <b>IGLV1-44</b>  | 2.82                 | <b>IGLV5-52</b>  | 2.39                 |
| <b>IGLV1-40</b>  | 2.72                 | <b>IGLV1-40</b>  | 2.12                 |
| <b>IGLV5-37</b>  | 2.46                 | <b>IGLV2-14</b>  | 1.97                 |
| <b>IGLV2-14</b>  | 2.28                 | <b>IGLV1-51</b>  | 1.52                 |
| <b>IGLV1-51</b>  | 2.00                 | <b>IGLV3-9</b>   | 1.36                 |
| <b>IGLV2-11</b>  | 1.73                 | <b>IGLV1-44</b>  | 1.20                 |
| <b>IGLV3-9</b>   | 1.57                 | <b>IGLV3-25</b>  | 1.15                 |
| <b>IGLV1-47</b>  | 1.51                 | <b>IGLV1-47</b>  | 1.13                 |
| <b>IGLV3-25</b>  | 1.41                 | <b>IGLV4-3</b>   | 0.86                 |
| <b>IGLV2-23</b>  | 0.75                 | <b>IGLV2-11</b>  | 0.79                 |
| <b>IGLV5-45</b>  | 0.66                 | <b>IGLV5-45</b>  | 0.64                 |
| <b>IGLV3-10</b>  | 0.66                 | <b>IGLV2-18</b>  | 0.57                 |
| <b>IGLV2-18</b>  | 0.65                 | <b>IGLV2-23</b>  | 0.52                 |
| <b>IGLV4-3</b>   | 0.57                 | <b>IGLV3-10</b>  | 0.38                 |
| <b>IGLV5-39</b>  | 0.49                 | <b>IGLV8-61</b>  | 0.31                 |
| <b>IGLV8-61</b>  | 0.24                 | <b>IGLV4-60</b>  | 0.15                 |
| <b>IGLV4-69</b>  | 0.22                 | <b>IGLV4-69</b>  | 0.05                 |
| <b>IGLV1-36</b>  | 0.11                 | <b>IGLV1-36</b>  | 0.05                 |
| <b>IGLV3-16</b>  | 0.07                 | <b>IGLV3-12</b>  | 0.05                 |
| <b>IGLV7-46</b>  | 0.03                 | <b>IGLV3-16</b>  | 0.05                 |
| <b>IGLV7-43</b>  | 0.03                 | <b>IGLV5-39</b>  | 0.05                 |
| <b>IGLV3-12</b>  | 0.02                 | <b>IGLV7-43</b>  | 0.02                 |
| <b>IGLV4-60</b>  | 0.00                 | <b>IGLV7-46</b>  | 0.02                 |
| <b>IGLV3-22</b>  | 0.00                 | <b>IGLV3-22</b>  | 0.00                 |

**Supplementary Table 4: The usage of IGLJ genes in the HH and IHB library**

| HH-IgL   | Frequency (%) | IHB-IgL  | Frequency (%) |
|----------|---------------|----------|---------------|
| IGLJ2*01 | 41.24         | IGLJ3*02 | 37.38         |
| IGLJ3*02 | 33.74         | IGLJ2*01 | 37.33         |
| IGLJ1*01 | 19.33         | IGLJ1*01 | 18.97         |
| IGLJ7*01 | 5.24          | IGLJ7*01 | 5.43          |
| IGLJ6*01 | 0.18          | IGLJ6*01 | 0.35          |
| IGLJ5*01 | 0.15          | IGLJ5*01 | 0.32          |
| IGLJ4*01 | 0.06          | IGLJ4*01 | 0.20          |
| IGLJ5*02 | 0.04          | IGLJ5*02 | 0.03          |
| IGLJ7*02 | 0.02          | IGLJ7*02 | 0.01          |

**Supplementary Table 5: The comparisons of the somatic hypermutation levels between the HH and IHB library**

|                                                 | Library |         | <i>p</i> , <i>OR(95%CI)</i> <sup>a</sup> |
|-------------------------------------------------|---------|---------|------------------------------------------|
|                                                 | HH (%)  | IHB (%) | IHB vs. HH                               |
| <b>IgK repertoire</b>                           |         |         |                                          |
| <b>P (V<sub>Identity</sub>≥90%)<sup>b</sup></b> | 87.59   | 86.92   | <2.2E-16,<br>1.062(1.047,1.077)          |
| <b>P(mut in CDR1)<sup>c</sup></b>               | 65.47   | 64.01   | <2.2E-16,<br>1.066(1.056,1.076)          |
| <b>P(mut in CDR2)<sup>d</sup></b>               | 29.77   | 29.32   | <2.2E-16,<br>1.021(1.011,1.032)          |
| <b>IgL repertoire</b>                           |         |         |                                          |
| <b>P (V<sub>Identity</sub>≥90%)</b>             | 69.15   | 74.62   | <2.2E-16,<br>0.762(0.750,0.775)          |
| <b>P(mut in CDR1)</b>                           | 65.52   | 56.00   | <2.2E-16,<br>1.493(1.472,1.515)          |
| <b>P(mut in CDR2)</b>                           | 56.79   | 52.63   | <2.2E-16,<br>1.183(1.166,1.20)           |

a: Calculated by the logistic regression.

b: Frequency of the sequences with ≥90% V gene identity as the germline genes.

c: Frequency of the sequences with amino acid mutations in CDR1 regions.

d: Frequency of the sequences with amino acid mutations in CDR2 regions.

**Supplementary Table 6: The comparisons of the occurrence of junctional modifications in IgK and IgL repertoires**

| Junctional modifications     | Occurrence (%) |               |               |               |               |
|------------------------------|----------------|---------------|---------------|---------------|---------------|
|                              | 3VP            | 3VT           | 5JP           | 5JT           | N             |
| <b>IgK repertoire</b>        |                |               |               |               |               |
| <b>HH</b>                    | 4.50           | 85.02         | 9.39          | 72.83         | 68.11         |
| <b>IHB</b>                   | 4.51           | 86.65         | 9.54          | 73.08         | 69.21         |
| <i>p</i> ,                   | 0.776,         | <2.2E-16,     | 0.033,        | 0.017,        | <2.2E-16,     |
| <b>OR(95%CI)<sup>a</sup></b> | 1.003          | 1.143         | 1.017         | 1.013         | 1.053         |
| <b>(HH vs. IHB)</b>          | (0.981,1.026)  | (1.128,1.159) | (1.001,1.033) | (1.002,1.023) | (1.042,1.063) |
| <b>IgL repertoire</b>        |                |               |               |               |               |
| <b>HH</b>                    | 2.53           | 89.40         | 10.41         | 67.90         | 71.07         |
| <b>IHB</b>                   | 3.04           | 88.36         | 10.37         | 69.03         | 70.73         |
| <i>p</i> ,                   | <2.2E-16,      | <2.2E-16,     | 0.719,        | 2.3E-11,      | 0.034,        |
| <b>OR(95%CI)<sup>a</sup></b> | 1.208          | 0.900         | 0.996         | 1.054         | 0.983         |
| <b>(HH vs. IHB)</b>          | (1.157,1.261)  | (0.880,0.920) | (0.973,1.019) | (1.038,1.070) | (0.968,0.999) |

a: Calculated by the logistic regression.
